RESEARCH ARTICLE

# Postnatal Anthropometric and Body Composition Profiles in Infants with Intrauterine Growth Restriction Identified by Prenatal Doppler

E. Mazarico<sup>1,2,3,4\*</sup>, R. Martínez-Cumplido<sup>1,2,3,4</sup>, M. Díaz<sup>5,6</sup>, G. Sebastiani<sup>5,6</sup>, L. Ibáñez<sup>5,6</sup>, M. D. Gómez-Roig<sup>1,2,3,4</sup>

**1** BCN-Barcelona Center of Maternal-Fetal Medicine and Neonatology (Hospital Sant Joan de Déu and Hospital Clínic), Fetal i+D Fetal Medicine Research Center, Barcelona, Spain, **2** Spanish Maternal and Child Health Network, Retic SAMID, Instituto Carlos III, Madrid, Spain, **3** IDIBAPS, University of Barcelona, Barcelona, Spain, **4** Centre for Biomedical Research on Rare Diseases (CIBER-ER), Barcelona, Spain, **5** Endocrinology Unit, Sant Joan de Déu University Hospital, Barcelona, Spain, **6** Centre for Biomedical Research on Diabetes and Associated Metabolic Diseases (CIBERDEM), Madrid, Spain

\* [emazarico@hsjdbcn.org](mailto:emazarico@hsjdbcn.org)

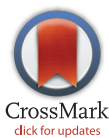

**OPEN ACCESS**

**Citation:** Mazarico E, Martínez-Cumplido R, Díaz M, Sebastiani G, Ibáñez L, Gómez-Roig MD (2016) Postnatal Anthropometric and Body Composition Profiles in Infants with Intrauterine Growth Restriction Identified by Prenatal Doppler. PLoS ONE 11(3): e0150152. doi:10.1371/journal.pone.0150152

**Editor:** Olivier Baud, Hôpital Robert Debré, FRANCE

**Received:** October 13, 2015

**Accepted:** February 10, 2016

**Published:** March 3, 2016

**Copyright:** © 2016 Mazarico et al. This is an open access article distributed under the terms of the [Creative Commons Attribution License](https://creativecommons.org/licenses/by/4.0/), which permits unrestricted use, distribution, and reproduction in any medium, provided the original author and source are credited.

**Data Availability Statement:** Data contain patient-specific, medical information and cannot be made publicly available. Please contact E. Mazarico for requests for data: [emazarico@hsjdbcn.org](mailto:emazarico@hsjdbcn.org).

**Funding:** MD and LI are Clinical Investigators of CIBERDEM (Centre for Biomedical Research on Diabetes and Associated Metabolic Diseases, Instituto de Salud Carlos III, Madrid, Spain). This study was partially supported by a grant (PI08/0443) included in the National I+D+I program, co-sponsored by the Instituto de Salud Carlos III – Subdirección General de Evaluación y Fomento de la

## Abstract

### Introduction

Infant anthropometry and body composition have been previously assessed to gauge the impact of intrauterine growth restriction (IUGR) at birth, but the interplay between prenatal Doppler measurements and postnatal development has not been studied in this setting. The present investigation was performed to assess the significance of prenatal Doppler findings relative to postnatal anthropometrics and body composition in IUGR newborns over the first 12 months of life.

### Patients and Methods

Consecutive cases of singleton pregnancies with suspected IUGR were prospectively enrolled over 12 months. Fetal biometry and prenatal Doppler ultrasound examinations were performed. Body composition was assessed by absorptiometry at ages 10 days, and at 4 and 12 months.

### Results

A total of 48 pregnancies qualifying as IUGR were studied. Doppler parameters were normal in 26 pregnancies. The remaining 22 deviated from normal, marked by an Umbilical Artery Pulsatility Index (UA-PI) >95<sup>th</sup> centile or Cerebro-placental ratio (CPR) <5<sup>th</sup> centile. No significant differences emerged when comparing anthropometry and body composition at each time point, in relation to Doppler findings. Specifically, those IUGR newborns with and without abnormal Doppler findings had similar weight, length, body mass index, lean and fat

Investigación Sanitaria – and the Fondo Europeo de Desarrollo Regional (FEDER), Madrid, Spain.

**Competing Interests:** The authors have declared that no competing interests exist.

mass, and bone mineral content throughout the first 12 months of life. In a separate analysis, when comparing IUGR newborns by Doppler (abnormal UA-PI vs. abnormal CPR), anthropometry and body composition did not differ significantly.

## Conclusions

Infants with IUGR maintain a pattern of body composition during the first year of life that is independent of prenatal Doppler findings. Future studies with larger sample sizes and correlating with hormonal status are warranted to further extend the phenotypic characterization of the various conditions now classified under the common label of IUGR.

## Introduction

Normal fetal growth results from a genetically pre-determined growth potential, which in turn is modulated by maternal, fetal, placental, and environmental factors [1]. In case of intrauterine growth restriction (IUGR), this genetically endowed growth potential fails to materialize. IUGR is normally used to refer to small fetuses with higher risk for fetal in utero deterioration, stillbirth and overall poorer perinatal outcome as compared with normally grown fetuses. In general, IUGR is associated with Doppler signs suggesting hemodynamic redistribution as reflection of fetal adaptation to undernutrition/hypoxia, histological and biochemical signs of placental disease and higher risk of preeclampsia. On the other hand, constitutionally small fetuses (SGA) typically weigh less, and placental insufficiency at term may not be evident in umbilical arterial Doppler studies, so that a diagnosis of IUGR often represents a challenge. The term SGA has been used to differentiate a sub-group of small fetuses that do not present the changes above described, so that there appear to be no fetal adaptation to an abnormal environment, and with perinatal outcomes similar to those of normally grown fetuses. Still, the importance of differentiating these conditions cannot be overstated. As IUGR is a major contributor to stillbirths and perinatal morbidity, small for gestational age (SGA) births merely represent the low end of normal infant size distribution [2].

As yet, no single parameter has proven pivotal in distinguishing between late-onset IUGR and SGA status. However, abnormal Doppler studies (i.e., uterine arterial indices and cerebroplacental ratio [CPR]) signaling placental compromise and severe growth restriction (<3<sup>rd</sup> centile) have been identified as risk factors for adverse outcomes in SGA infants, implying that such births instead qualify as IUGR [3,4].

A number of short- and long-term health risks have also been identified with respect to SGA infants [5]. It is generally acknowledged that extremes of normal birth weight heighten perinatal morbidity and mortality risk. In addition, IUGR has long-term metabolic, neurologic, and cardiovascular consequences, as a result of the so-called fetal programming [6–12]. Infant anthropometrics and body composition have been evaluated in various studies to gauge the impact of IUGR at birth [13–17], but the interplay between Doppler measurements and post-natal development has not been studied in this setting.

The present study aimed at assessing the significance of Doppler findings in relation to post-natal anthropometrics and body composition in IUGR newborns throughout the first 12 months of life.

## Material and Methods

### Subjects

Consecutive singleton pregnancies with suspected IUGR, spanning over a 12-month period at our outpatient Obstetrics clinic, were prospectively recruited for the study. IUGR was suspected if estimated fetal weight was below 3<sup>rd</sup> centile with normal or abnormal uterine arterial Doppler or cerebroplacental ratio [18].

IUGR was confirmed after birth in all newborns fulfilling the following criteria: 1) birth weight <3<sup>rd</sup> centile with normal Doppler; or 2) birth weight <3<sup>rd</sup> centile with abnormal uterine arterial Doppler study (pulsatility index [PI] >95<sup>th</sup> centile) [19]; or 3) birth weight <3<sup>rd</sup> centile with abnormal cerebroplacental ratio (CPR <5<sup>th</sup> centile) [20]. Exclusion criteria were: 1) gestational age <37 weeks at delivery; 2) maternal use of drugs that may affect fetal growth or biochemical markers (including steroids); 3) gestational hypertension; and 4) preeclampsia [21].

All patients included were normotensive and all deliveries were dated by crown-rump lengths measured in the first trimester [22].

### Doppler measurements

In each case, fetal biometry and prenatal Doppler ultrasound (US) examinations were performed by experienced operators using either a Siemens Sonoline Antares (Siemens Medical Systems, Malvern, PA, USA) or a General Electric Voluson E8 (GE Medical Systems, Zipf, Austria) unit equipped with a 6–2 MHz linear curved-array transducer. Estimated fetal weight (EFW) was calculated from biparietal diameter, head and abdominal circumferences, and femoral length using the Hadlock formula [23]. The PI of the umbilical artery (UA) was calculated from a free-floating portion of the umbilical cord. To minimize variability, the PI of middle cerebral artery (MCA) was also measured (in the transverse view of fetal head) at its origin from the circle of Willis [19]. Cerebroplacental ratio (CPR) was then calculated as MCA-PI divided by UA-PI [20]. To assess uterine artery, a US probe was placed on the lower abdominal quadrant, angled medially; and color Doppler imaging was again engaged to identify the UA at its apparent intersection with the external iliac artery. Measurements were taken approximately 1 cm distal to the perceived junction. Doppler recordings were performed in the absence of fetal movements and with voluntary maternal suspension of respiration. All pulsed Doppler indices were generated automatically from at least three consecutive waveforms, with the angle of insonation as close to 0 as possible and always less than 30°. A high-pass wall filter of 70 Hz was used to record low flow velocities and to avoid artifacts. The last Doppler evaluation within 1 week of delivery was referenced for data analysis.

### Body composition

Body composition was assessed by absorptiometry at 10 days of age, and at 4 and 12 months using a Lunar Prodigy bundled with proprietary software (v3.4/3.5; Lunar Corp, Madison, WI, USA) adapted for infants [13,14]. All body composition studies were performed during spontaneous sleep prior to feeding. Body fat, abdominal fat, lean mass, and bone mineral content (BMC) were assessed. Coefficients of variation (CVs) were 3% for fat and lean mass [13,14].

### Statistics and ethics

All data were expressed as mean  $\pm$  standard error of the mean. Student's *t*-test was applied for quantitative variables of normally distributed data. Non-normally distributed data were compared via non-parametric Mann-Whitney U test (two categories). Standard software (SPSS

v19.0 for PC; SPSS Inc, Chicago, IL, USA) was utilized for all calculations, setting statistical significance at  $p < 0.05$ .

The study protocol was approved by the Institutional Review Board of Barcelona University Hospital. Written informed consent was granted from the parents or guardians of all participants.

## Results

A total of 48 pregnancies qualifying as IUGR were studied. Doppler parameters were normal in 26 pregnancies. The remaining 22 deviated from normal, marked by al UA-PI  $> 95^{\text{th}}$  centile [19] or CPR  $< 5^{\text{th}}$  centile [20].

Anthropometry and body composition profiles were adjusted for gestational age and gender.

At the time of delivery, IUGR births with normal and abnormal Doppler findings differed significantly in terms of gestational age and weight percentile, although all of them were below  $< 3^{\text{rd}}$  centile. There were no significant differences in birth weight, birth length or BMI (Table 1).

No significant differences emerged either when comparing anthropometry and body composition at age 10 days, and at 4 and 12 months according to Doppler findings (Table 1 and Table in S1 Table). Specifically, IUGR births with and without abnormal Doppler were similar in weight, length, BMI, lean mass, fat mass, and BMC during the 12-month follow-up period.

**Table 1. Anthropometry and body composition of IUGR with normal and abnormal Doppler.**

|                                                   | IUGR with normal Doppler |             |              |              | IUGR with abnormal Doppler |              |              |               |
|---------------------------------------------------|--------------------------|-------------|--------------|--------------|----------------------------|--------------|--------------|---------------|
|                                                   | Birth                    | 10 days     | 4 months     | 12 months    | Birth                      | 10 days      | 4 months     | 12 months     |
| N                                                 | 26                       | 26          | 24           | 10           | 22                         | 22           | 14           | 11            |
| Girls (%)                                         | 42                       | 42          | 45           | 43           | 48                         | 48           | 45           | 48            |
| <b>Auxology</b> <sup>¶</sup> Gestational age (wk) | 38.2 ± 0.2               | -           |              |              | 37.7 ± 0.2 <sup>a</sup>    | -            |              |               |
| Birth Weight (g)                                  | 2279 ± 290               | -           |              |              | 2208 ± 210                 | -            |              |               |
| Birth Weight (percentile)                         | 0.85 ± 0.2               | -           |              |              | 1.6 ± 0.4 <sup>a</sup>     | -            |              |               |
| Birth Length (cm)                                 | 45.5 ± 1.1               | -           |              |              | 45.2 ± 1.3                 | -            |              |               |
| BMI (Kg/m <sup>2</sup> )                          | 11.0 ± 2.4               | -           |              |              | 10.8 ± 1.2                 | -            |              |               |
| <b>Endocrinology</b> IGF-I (ng/mL) <sup>§</sup>   | 48.43 ± 9.67             | -           | 68.52 ± 5.37 | 70.52 ± 8.27 | 40.62 ± 3.61               | -            | 65.72 ± 5.33 | 56.13 ± 10.01 |
| <b>Body Composition</b> <sup>#</sup> Length(cm)   |                          | 47.2 ± 1.0  | 60.1 ± 1.8   | 72.7 ± 6.0   |                            | 44.7.5 ± 1.2 | 60.0 ± 2.3   | 73.5 ± 4.1    |
| Weight (g)                                        |                          | 2704 ± 177  | 6029 ± 797   | 8818 ± 1710  |                            | 2629 ± 234   | 5778 ± 837   | 8710 ± 1070   |
| BMI (Kg/m <sup>2</sup> )                          |                          | 12.1 ± 1.4  | 16.6 ± 1.4   | 16.5 ± 2.0   |                            | 11.6 ± 1.4   | 16.0 ± 1.1   | 16.1 ± 1.7    |
| Fat Mass (g)                                      |                          | 471 ± 283   | 1880 ± 254   | 3403 ± 853   |                            | 408 ± 213    | 1902 ± 172   | 3520 ± 717    |
| Lean Mass (g)                                     |                          | 2240 ± 774  | 3870 ± 544   | 5451 ± 1137  |                            | 2267 ± 620   | 3730 ± 678   | 5359 ± 700    |
| Bone mineral density (g/cm <sup>2</sup> )         |                          | 0.19 ± 0.06 | 0.30 ± 0.03  | 0.35 ± 0.14  |                            | 0.18 ± 0.05  | 0.32 ± 0.05  | 0.36 ± 0.05   |

Values are mean ± SEM. IUGR, intrauterine growth restriction; BMI, body mass index

<sup>§</sup> IGF-I was assessed at birth in cord blood, and at 4, 12 & 24 mo in peripheral blood in fasting state

<sup>¶</sup> Anthropometric values (mean ± SEM) in newborns with gestational age 38 wk: Boys, birth weight, 3175 ± 17; birth length, 49.1 ± 0.1; Girls, birth weight, 3017 ± 16; birth length, 48.9 ± 0.1 (Ferrández et al., 2004)

<sup>#</sup> Normative values in appropriate-for-gestational-age infants [birth weight between -1SD and +1SD (approximately percentiles 25–75) according to the Spanish growth charts] are shown in Table in S1 Table.

<sup>a</sup>  $p < 0.05$  adjusted for gender

doi:10.1371/journal.pone.0150152.t001

In a separate analysis, comparing IUGR births by Doppler findings (abnormal UA-PI vs. abnormal CPR), anthropometry and body composition did not differ significantly.

IGF-1 concentrations either in cord blood or in the first year of life were not related to the presence or absence of Doppler abnormalities (Table 1).

## Discussion

Birth weight reflects fetal growth in utero and is determined by a number of variables, such as gender, maternal height/weight, parity, and ethnicity. IUGR signifies that anticipated fetal growth has fallen short [1]. Differentiating SGA infants, marked by constitutional smallness, from IUGR births often presents a diagnostic challenge. However, it is important to do so, given the increased risk of perinatal morbidity and mortality attached to IUGR, as well as the long-term metabolic, cardiovascular, and neurologic consequences of fetal programming *in utero* [24–31].

Usually, IUGR status is associated with Doppler imaging evidence of hemodynamic redistribution (stemming from fetal adaptation to undernutrition/hypoxia), in addition to histologic and biochemical evidence of placental disease [1]. Thus, Doppler indices, such as UA-PI and CPR, may help to identify the settings (as above) where worse perinatal and long-term outcomes are anticipated [3, 4].

Several previous studies have already investigated the evolving body composition in infants with low birth weights, describing a characteristic pattern (less lean mass, fat mass, and bone mineral density) bearing higher metabolic risk [13,14,32,33]. However, they failed to distinguish the presence of IUGR from low birth weight with no signs of placental insufficiency or hypoxia, based on Doppler findings.

This study is the first to assess postnatal body composition in infants with and without abnormal Doppler determinants. Our results are aligned with those in previous reports, showing less lean mass, fat mass, and bone mineral density relative to infants of normal birth weight. However, one might expect an eventual recovery of normal fetal growth and body composition in IUGR due to placental insufficiency, once hypoxia and undernutrition subside. However, we found no differences in body composition during the first 12 months of postnatal life, regardless of whether placental insufficiency, shown by Doppler abnormalities, was present or not. Accordingly, it seems that birth weight percentile determines body composition over the first few years in case of IUGR, independently of the etiology.

The main strengths of the study are its longitudinal nature and the assessment of body composition by absorptiometry in newborns and very young infants. Among the study limitations were the relatively small sampling size, the loss of follow-up in a percentage of the study population, the lack of hormonal assessments, and the non-inclusion of other subsets of patients, such as SGA and appropriate-for-gestational-age newborns. In conclusion, we disclose that infants with IUGR maintain a uniform pattern of body composition during the first year of life, independent of Doppler findings during pregnancy. Additional studies in larger populations, including hormonal assessments, are warranted to further delineate phenotypically assorted conditions presently bearing the common label of IUGR.

## Supporting Information

**S1 Table. Body composition of infants born appropriate-for-gestational age (AGA, n = 31) exclusively breast-fed in early infancy (0–4 mo).**  
(DOCX)

## Acknowledgments

MD and LI are Clinical Investigators of CIBERDEM (Centre for Biomedical Research on Diabetes and Associated Metabolic Diseases, Instituto de Salud Carlos III, Madrid, Spain). This study was partially supported by a grant (PI08/0443) included in the National I+D+I program, co-sponsored by the Instituto de Salud Carlos III—Subdirección General de Evaluación y Fomento de la Investigación Sanitaria—and the Fondo Europeo de Desarrollo Regional (FEDER), Madrid, Spain.

## Author Contributions

Conceived and designed the experiments: LI MDGR. Performed the experiments: EM MD GS. Analyzed the data: EM RMC MD. Contributed reagents/materials/analysis tools: MD GS. Wrote the paper: EM RMC LI MDGR.

## References

1. Golderberg RL, Cliver SP. Small for gestational age and intrauterine growth restriction: definitions and standards. *Clin Obstet Gynecol.* 1997; 40:704–714. PMID: [9429784](#)
2. Bernstein IM, Horbar JD, Badger GJ, Ohlsson A, Golan A. Morbidity and mortality among very-low-birth-weight neonates with intrauterine growth restriction. The Vermont Oxford Network. *Am J Obstet Gynecol.* 2000; 182: 198–206. PMID: [10649179](#)
3. Mari G, Moise KJ, Deter RL, Kirshon B, Carpenter RJ, Huhta J. Doppler assessment of the pulsatility index in the cerebral circulation of the human fetus. *Am J Obstet Gynecol.* 1989; 160:698–703. PMID: [2648841](#)
4. Gramellini D, Folli MC, Raboni S, Vadora E, Merialdi A. Cerebral-umbilical Doppler ratio as a predictor of adverse perinatal outcome. *Obstet Gynecol.* 1992; 74:416–420.
5. Wilcox AJ. Intrauterine growth retardation: beyond birthweight criteria. *Early Hum Dev.* 1983; 8:189–193. PMID: [6641564](#)
6. Yu ZB, Han SP, Zhu GZ, Zhu C, Wang XJ, Cao XG, et al. Birth weight and subsequent risk of obesity: a systematic review and meta-analysis. *Obes Rev.* 2011; 12: 525–542. doi: [10.1111/j.1467-789X.2011.00867.x](#) PMID: [21438992](#)
7. Singhal A, Kennedy K, Lanigan J, Fewtrell M, Cole TJ, Stephenson T, et al. Nutrition in infancy and long-term risk of obesity: evidence from 2 randomized controlled trials. *Am J Clin Nutr.* 2010; 92:1133–1144. doi: [10.3945/ajcn.2010.29302](#) PMID: [20881062](#)
8. Barker DJ, Osmond C, Golding J, Kuh D, Wadsworth ME. Growth in utero, blood pressure in childhood and adult life, and mortality from cardiovascular disease. *BMJ.* 1989; 298:564–567. PMID: [2495113](#)
9. Osmond C, Barker DJ. Fetal, infant, and childhood growth are predictors of coronary heart disease, diabetes, and hypertension in adult men and women. *Environ Health Perspect.* 2000; 108 (Suppl 3) 545–553. PMID: [10852853](#)
10. Fabricius-Bjerre S, Jensen RB, Færch K, Larsen T, Mølgaard C, Michaelsen KF, et al. Impact of birth weight and early infant weight gain on insulin resistance and associated cardiovascular risk factors in adolescence. *PLoS One.* 2011; 6:e20595. doi: [10.1371/journal.pone.0020595](#) PMID: [21655104](#)
11. Singhal A, Cole TJ, Fewtrell M, Kennedy K, Stephenson T, Elias-Jones A, et al. Promotion of faster weight gain in infants born small for gestational age: is there an adverse effect on later blood pressure? *Circulation.* 2007; 115:213–220. PMID: [17179023](#)
12. Vaag A. Low birth weight and early weight gain in the metabolic syndrome: consequences for infant nutrition. *Int J Gynaecol Obstet.* 2009; 104(Suppl. 1): S32–S34. doi: [10.1016/j.ijgo.2008.11.026](#) PMID: [19155006](#)
13. Ibáñez L, Sebastiani G, Diaz M, Gómez-Roig MD, Lopez-Bermejo A, de Zegher F. Low body adiposity and high leptinemia in breast-fed infants born small-for-gestational-age. *J Pediatr* 2010; 156:145–147. doi: [10.1016/j.jpeds.2009.06.050](#) PMID: [20006765](#)
14. Ibáñez L, Sebastiani G, Lopez-Bermejo A, Díaz M, Gómez-Roig MD, de Zegher F. Gender specificity of body adiposity and circulating adiponectin, visfatin, insulin, and insulin growth factor-I at term birth: relation to prenatal growth. *J Clin Endocrinol Metab.* 2008; 93:2774–2778. doi: [10.1210/jc.2008-0526](#) PMID: [18460569](#)
15. de Zegher F, Sebastiani G, Díaz M, Sánchez-Infantes D, López-Bermejo A, Ibáñez L. Body composition and circulating high-molecular-weight adiponectin and IGF-I in infants born small for gestational

- age: breast versus formula feeding. *Diabetes*. 2012; 61:1969–1973. doi: [10.2337/db11-1797](https://doi.org/10.2337/db11-1797) PMID: [22648385](https://pubmed.ncbi.nlm.nih.gov/22648385/)
16. Verkauskiene R, Beltrand J, Claris O, Chevenne D, Deghmoun S, Dorgeret S, et al. Impact of fetal growth restriction on body composition and hormonal status at birth in infants of small and appropriate weight for gestational age. *Eur J Endocrinol*. 2007; 157:605–612. PMID: [17984240](https://pubmed.ncbi.nlm.nih.gov/17984240/)
  17. Padoan A, Rigano S, Ferrazzi E, Beaty BL, Battaglia FC, Galan HL. Differences in fat and lean mass proportions in normal and growth-restricted fetuses. *Am J Obstet Gynecol*. 2004; 191:1459–1464. PMID: [15507983](https://pubmed.ncbi.nlm.nih.gov/15507983/)
  18. Figueras F, Gratacós E. Update on the diagnosis and classification of fetal growth restriction and proposal of a stage-based management protocol. *Fetal Diagn Ther*. 2014; 36(2):86–98 doi: [10.1159/000357592](https://doi.org/10.1159/000357592) PMID: [24457811](https://pubmed.ncbi.nlm.nih.gov/24457811/)
  19. Arduini D, Rizzo G. Normal values of pulsatility index from fetal vessels: a cross-sectional study on 1556 healthy fetuses. *J Perinat Med*. 1990; 18:165–172. PMID: [2200862](https://pubmed.ncbi.nlm.nih.gov/2200862/)
  20. Baschat AA, Gembruch U. The cerebroplacental Doppler ratio revisited. *Ultrasound Obstet Gynecol*. 2003; 21:124–127. PMID: [12601831](https://pubmed.ncbi.nlm.nih.gov/12601831/)
  21. Brown MA, Lindheimer MD, de Swiet M, Van Assche A, Moutquin JM. The classification and diagnosis of the hypertensive disorders of pregnancy: statement from the International Society for the Study of Hypertension in Pregnancy (ISSHP). *Hypertens Pregnancy*. 2001; 20:IX–XIV. PMID: [12044323](https://pubmed.ncbi.nlm.nih.gov/12044323/)
  22. Robinson HP, Fleming JE. A critical evaluation of sonar “crown-rump length” measurements. *Br J Obstet Gynaecol*. 1975; 82:702–710. PMID: [1182090](https://pubmed.ncbi.nlm.nih.gov/1182090/)
  23. Hadlock FP, Harrist RB, Sharman RS, Deter RL, Park SK. Estimation of fetal weight with the use of head, body, and femur measurements—a prospective study. *Am J Obstet Gynecol*. 1985; 151:333–337. PMID: [3881966](https://pubmed.ncbi.nlm.nih.gov/3881966/)
  24. Bernardi JR, Ferreira CF, Nunes M, Homrich da Silva C, Bosa LV. Impact of perinatal different intrauterine environments on child growth and development in the first six months of life—IVAPSA birth cohort: rationale, design, and methods. *BMC Pregnancy Childbirth*. 2012; 12:25. doi: [10.1186/1471-2393-12-25](https://doi.org/10.1186/1471-2393-12-25) PMID: [22471837](https://pubmed.ncbi.nlm.nih.gov/22471837/)
  25. Eriksson JG, Forsen T, Tuomilehto J, Jaddoe VW, Osmond C, Barker DJ. Effects of size at birth and childhood growth on the insulin resistance syndrome in elderly individuals. *Diabetologia*. 2002; 45:342–348. PMID: [11914739](https://pubmed.ncbi.nlm.nih.gov/11914739/)
  26. Morrison JL, Duffield JA, Muhlhausler BS, Gentili S, McMillen IC. Fetal growth restriction, catch-up growth and the early origins of insulin resistance and visceral obesity. *Pediatr Nephrol*. 2010; 25:669–677. doi: [10.1007/s00467-009-1407-3](https://doi.org/10.1007/s00467-009-1407-3) PMID: [20033220](https://pubmed.ncbi.nlm.nih.gov/20033220/)
  27. McCarton CM, Wallace IF, Divon M, Vaughan HG Jr. Cognitive and neurologic development of the premature, small for gestational age infant through age 6: comparison by birth weight and gestational age. *Pediatrics*. 1996; 98:1167–1178. PMID: [8951271](https://pubmed.ncbi.nlm.nih.gov/8951271/)
  28. Hutton JL, Pharoah PO, Cooke RW, Stevenson RC. Differential effects of preterm birth and small gestational age on cognitive and motor development. *Arch Dis Child Fetal Neonatal Ed* 1997; 76:F75–F81. PMID: [9135284](https://pubmed.ncbi.nlm.nih.gov/9135284/)
  29. Strauss RS. Adult functional outcome of those born small for gestational age: twenty-six-year follow-up of the 1970 British Birth Cohort. *JAMA*. 2000; 283:625–632. PMID: [10665702](https://pubmed.ncbi.nlm.nih.gov/10665702/)
  30. Wiles NJ, Peters TJ, Heron J, Gunnell D, Emond A, Lewis G. Fetal growth and childhood behavioral problems: results from the ALSPAC cohort. *Am J Epidemiol*. 2006; 163:829–837. PMID: [16524956](https://pubmed.ncbi.nlm.nih.gov/16524956/)
  31. de Bie HM, Oostrom KJ, Delemarre-van de Waal HA. Brain development, intelligence and cognitive outcome in children born small for gestational age. *Horm Res Paediatr*. 2010; 73:6–14. doi: [10.1159/000271911](https://doi.org/10.1159/000271911) PMID: [20190535](https://pubmed.ncbi.nlm.nih.gov/20190535/)
  32. Larciprete G, Valensise H, Di Piero G, Vasapollo B, Casalino B, Arduini D, et al. Intrauterine growth restriction and fetal body composition. *Ultrasound Obstet Gynecol*. 2005; 26:258–262. PMID: [16116565](https://pubmed.ncbi.nlm.nih.gov/16116565/)
  33. Kensara OA, Wootton SA, Phillips DI, Patel M, Jackson AA, Elia M. Hertfordshire Study Group. Foetal programming of body composition: relation between birth weight and body composition measured with dual-energy X-ray absorptiometry and anthropometric methods in older Englishmen. *Am J Clin Nutr*. 2005; 82:980–987. PMID: [16280428](https://pubmed.ncbi.nlm.nih.gov/16280428/)
